# Supplementary material for: Integrative Analysis of Genome and Expression Profile Data Reveals the Genetic Mechanism of the Diabetic Pathogenesis in Goto Kakizaki (GK) Rats
Source: Front Genet. 2019 Jan 10;9:724. doi: 10.3389/fgene.2018.00724 (PMC6335273; doi:10.3389/fgene.2018.00724)
Supplement: TABLE S2 — The coordinates of PASS region. [file Table_2.XLSX]

## Sheet: pass region (merge)
chr	start	end	length(bp)		chr	start	end	length(bp)
1	790001	880000	90000		8	52760001	52810000	50000
1	1070001	1290000	220000		8	52830001	52930000	100000
1	1330001	1480000	150000		8	52990001	53080000	90000
1	1520001	1660000	140000		8	53100001	53190000	90000
1	8440001	8500000	60000		8	53620001	53680000	60000
1	9760001	9870000	110000		8	54180001	54270000	90000
1	9890001	9980000	90000		8	54320001	54370000	50000
1	10040001	10100000	60000		8	54600001	54700000	100000
1	10280001	10400000	120000		8	55410001	55520000	110000
1	10420001	11020000	600000		8	55660001	55740000	80000
1	11100001	11150000	50000		8	56970001	57030000	60000
1	15330001	15410000	80000		8	60920001	61030000	110000
1	15500001	15580000	80000		8	61830001	61890000	60000
1	15720001	15860000	140000		8	61970001	62030000	60000
1	16690001	16740000	50000		8	62580001	62700000	120000
1	24700001	24830000	130000		8	62730001	62780000	50000
1	24990001	25120000	130000		8	63200001	63290000	90000
1	25200001	25290000	90000		8	63320001	63400000	80000
1	25310001	25370000	60000		8	63900001	63970000	70000
1	34930001	35010000	80000		8	64050001	64150000	100000
1	35350001	35480000	130000		8	64160001	64240000	80000
1	35590001	35690000	100000		8	64450001	64500000	50000
1	36080001	36150000	70000		8	64870001	65080000	210000
1	36320001	36410000	90000		8	65220001	65320000	100000
1	36490001	36590000	100000		8	65460001	65560000	100000
1	36710001	36810000	100000		8	65570001	65720000	150000
1	40170001	40260000	90000		8	65790001	65880000	90000
1	40520001	40610000	90000		8	66220001	66310000	90000
1	40810001	40880000	70000		8	66440001	66520000	80000
1	41370001	41420000	50000		8	66700001	66790000	90000
1	41520001	41690000	170000		8	66890001	67010000	120000
1	42390001	42550000	160000		8	67060001	67110000	50000
1	42670001	42810000	140000		8	67120001	67310000	190000
1	42950001	43100000	150000		8	67370001	67570000	200000
1	43110001	43340000	230000		8	67940001	67990000	50000
1	43400001	43490000	90000		8	71410001	71500000	90000
1	43620001	43710000	90000		8	73150001	73200000	50000
1	48440001	48510000	70000		8	74060001	74150000	90000
1	48520001	48570000	50000		8	74230001	74340000	110000
1	48720001	48870000	150000		8	75700001	75810000	110000
1	48890001	48950000	60000		8	75860001	75970000	110000
1	51620001	51670000	50000		8	76080001	76200000	120000
1	78630001	78730000	100000		8	76330001	76410000	80000
1	78860001	78950000	90000		8	76640001	76700000	60000
1	79090001	79220000	130000		8	79800001	79950000	150000
1	79280001	79380000	100000		8	80060001	80130000	70000
1	82660001	82800000	140000		8	80560001	80640000	80000
1	83090001	83150000	60000		8	81170001	81230000	60000
1	83250001	83330000	80000		8	81310001	81380000	70000
1	83350001	83570000	220000		8	81720001	81800000	80000
1	83620001	83700000	80000		8	82250001	82300000	50000
1	84000001	84110000	110000		8	82430001	82520000	90000
1	84230001	84370000	140000		8	82530001	82580000	50000
1	84480001	84580000	100000		8	82940001	83010000	70000
1	84660001	84760000	100000		8	83370001	83420000	50000
1	84840001	84970000	130000		8	87660001	87730000	70000
1	85020001	85110000	90000		8	90730001	90820000	90000
1	85240001	85360000	120000		8	90910001	90960000	50000
1	85490001	85580000	90000		8	91160001	91300000	140000
1	86880001	86930000	50000		8	91310001	91360000	50000
1	87320001	87400000	80000		8	91390001	91450000	60000
1	87560001	87630000	70000		8	93030001	93080000	50000
1	88040001	88100000	60000		8	94680001	94770000	90000
1	88830001	88900000	70000		8	97150001	97230000	80000
1	89060001	89110000	50000		8	97750001	97800000	50000
1	89250001	89340000	90000		8	101540001	101620000	80000
1	89620001	89730000	110000		8	114470001	114530000	60000
1	89740001	89840000	100000		8	131220001	131310000	90000
1	89910001	89990000	80000		9	1940001	2000000	60000
1	90290001	90380000	90000		9	6160001	6220000	60000
1	92310001	92360000	50000		9	7870001	7960000	90000
1	92530001	92580000	50000		9	8180001	8270000	90000
1	92620001	92680000	60000		9	8320001	8370000	50000
1	93110001	93170000	60000		9	8850001	8900000	50000
1	94870001	94990000	120000		9	14620001	14670000	50000
1	95010001	95060000	50000		9	14750001	14900000	150000
1	95090001	95230000	140000		9	16470001	16560000	90000
1	107770001	107860000	90000		9	22030001	22140000	110000
1	109370001	109420000	50000		9	25080001	25130000	50000
1	109860001	109910000	50000		9	30320001	30490000	170000
1	117870001	117970000	100000		9	30530001	30580000	50000
1	118500001	118570000	70000		9	30640001	30730000	90000
1	119110001	119190000	80000		9	30790001	30870000	80000
1	119830001	119920000	90000		9	31020001	31090000	70000
1	122760001	122860000	100000		9	31800001	31860000	60000
1	127310001	127400000	90000		9	32100001	32260000	160000
1	129560001	129620000	60000		9	32750001	32820000	70000
1	129700001	129800000	100000		9	32850001	32920000	70000
1	129840001	129890000	50000		9	32950001	33040000	90000
1	130310001	130380000	70000		9	33260001	33350000	90000
1	132830001	132910000	80000		9	34300001	34350000	50000
1	135400001	135470000	70000		9	36080001	36190000	110000
1	147120001	147220000	100000		9	36620001	36680000	60000
1	147400001	147460000	60000		9	36940001	37030000	90000
1	147560001	147750000	190000		9	37130001	37200000	70000
1	147760001	147830000	70000		9	37490001	37580000	90000
1	147990001	148110000	120000		9	37900001	37970000	70000
1	148200001	148330000	130000		9	38840001	39060000	220000
1	148350001	148410000	60000		9	40430001	40530000	100000
1	152530001	152580000	50000		9	47090001	47170000	80000
1	158910001	158980000	70000		9	47180001	47230000	50000
1	160730001	160780000	50000		9	47270001	47350000	80000
1	163190001	163280000	90000		9	47460001	47590000	130000
1	164060001	164190000	130000		9	47710001	47770000	60000
1	164240001	164300000	60000		9	47900001	47990000	90000
1	166650001	166700000	50000		9	48140001	48190000	50000
1	168350001	168400000	50000		9	48270001	48320000	50000
1	169110001	169190000	80000		9	48530001	48620000	90000
1	172750001	172820000	70000		9	58460001	58540000	80000
1	173260001	173340000	80000		9	60720001	60770000	50000
1	173630001	173680000	50000		9	61320001	61410000	90000
1	174770001	174820000	50000		9	62390001	62440000	50000
1	184470001	184530000	60000		9	64340001	64410000	70000
1	186330001	186380000	50000		9	68680001	68730000	50000
1	187320001	187370000	50000		9	68980001	69030000	50000
1	190120001	190170000	50000		9	69440001	69520000	80000
1	190410001	190500000	90000		9	71870001	71950000	80000
1	194460001	194520000	60000		9	72170001	72220000	50000
1	195620001	195730000	110000		9	72240001	72320000	80000
1	195800001	195910000	110000		9	72400001	72550000	150000
1	202070001	202130000	60000		9	76950001	77020000	70000
1	204340001	204530000	190000		9	78640001	78730000	90000
1	205100001	205160000	60000		9	80270001	80320000	50000
1	205320001	205370000	50000		9	80330001	80410000	80000
1	210610001	210660000	50000		9	80670001	80730000	60000
1	212330001	212390000	60000		9	80860001	80910000	50000
1	217050001	217120000	70000		9	81130001	81200000	70000
1	217130001	217190000	60000		9	81490001	81550000	60000
1	218150001	218200000	50000		9	81560001	81650000	90000
1	218470001	218550000	80000		9	81960001	82040000	80000
1	218930001	219000000	70000		9	82060001	82140000	80000
1	219200001	219270000	70000		9	82720001	82810000	90000
1	219720001	219770000	50000		9	83130001	83210000	80000
1	219980001	220050000	70000		9	83800001	83900000	100000
1	220080001	220130000	50000		9	84910001	84990000	80000
1	220240001	220290000	50000		9	85090001	85200000	110000
1	220560001	220610000	50000		9	85250001	85370000	120000
1	220700001	220750000	50000		9	85500001	85680000	180000
1	221270001	221370000	100000		9	86240001	86330000	90000
1	221480001	221540000	60000		9	86340001	86390000	50000
1	221890001	221950000	60000		9	86720001	86790000	70000
1	222100001	222190000	90000		9	89330001	89410000	80000
1	222840001	222930000	90000		9	89420001	89630000	210000
1	223560001	223630000	70000		9	90410001	90620000	210000
1	224390001	224460000	70000		9	102010001	102080000	70000
1	224750001	224830000	80000		9	103490001	103610000	120000
1	225280001	225420000	140000		9	115880001	116000000	120000
1	225580001	225730000	150000		9	116020001	116160000	140000
1	225740001	225830000	90000		9	116310001	116490000	180000
1	225950001	226010000	60000		9	118100001	118190000	90000
1	226620001	226680000	60000		10	130001	210000	80000
1	226740001	226790000	50000		10	1250001	1350000	100000
1	227470001	227590000	120000		10	1390001	1600000	210000
1	227620001	227710000	90000		10	14940001	15010000	70000
1	227780001	228030000	250000		10	20770001	20840000	70000
1	228120001	228170000	50000		10	23290001	23360000	70000
1	228280001	228330000	50000		10	31430001	31480000	50000
1	228440001	228680000	240000		10	36640001	36700000	60000
1	228760001	228850000	90000		10	38640001	38710000	70000
1	228980001	229040000	60000		10	38740001	38790000	50000
1	229080001	229130000	50000		10	39180001	39260000	80000
1	229400001	229530000	130000		10	39480001	39530000	50000
1	229560001	229610000	50000		10	41890001	41940000	50000
1	230110001	230230000	120000		10	45150001	45200000	50000
1	230280001	230410000	130000		10	50360001	50420000	60000
1	230570001	230660000	90000		10	50660001	50750000	90000
1	230800001	231080000	280000		10	50770001	50820000	50000
1	231110001	231180000	70000		10	50830001	50890000	60000
1	231230001	231320000	90000		10	51260001	51330000	70000
1	231420001	231470000	50000		10	52320001	52460000	140000
1	231560001	231620000	60000		10	59870001	59930000	60000
1	231940001	232010000	70000		10	60020001	60120000	100000
1	232200001	232290000	90000		10	60860001	60950000	90000
1	233120001	233220000	100000		10	62390001	62480000	90000
1	233300001	233390000	90000		10	66080001	66150000	70000
1	233480001	233530000	50000		10	66180001	66230000	50000
1	233590001	233670000	80000		10	68260001	68340000	80000
1	234720001	234890000	170000		10	68770001	69110000	340000
1	235180001	235230000	50000		10	69350001	69440000	90000
1	236740001	236830000	90000		10	79430001	79510000	80000
1	236850001	237060000	210000		10	79770001	79820000	50000
1	237540001	237670000	130000		10	79940001	79990000	50000
1	237970001	238100000	130000		10	82380001	82490000	110000
1	238180001	238230000	50000		10	82670001	82720000	50000
1	239880001	239950000	70000		10	82880001	82930000	50000
1	240130001	240180000	50000		10	83590001	83640000	50000
1	240300001	240350000	50000		10	83900001	83950000	50000
1	242390001	242470000	80000		10	84330001	84410000	80000
1	243580001	243790000	210000		10	84520001	84650000	130000
1	243840001	243930000	90000		10	84840001	84900000	60000
1	245160001	245240000	80000		10	84950001	85000000	50000
1	245290001	245470000	180000		10	85210001	85290000	80000
1	245560001	245650000	90000		10	85590001	85680000	90000
1	246190001	246250000	60000		10	85820001	85880000	60000
1	246340001	246470000	130000		10	85930001	86100000	170000
1	246740001	246790000	50000		10	86290001	86380000	90000
1	247010001	247100000	90000		10	88040001	88100000	60000
1	247420001	247520000	100000		10	93850001	93930000	80000
1	247640001	247690000	50000		10	94780001	94830000	50000
1	248210001	248280000	70000		10	96460001	96510000	50000
1	248510001	248600000	90000		10	96540001	96600000	60000
1	249190001	249280000	90000		10	96620001	96670000	50000
1	249450001	249530000	80000		10	96720001	96810000	90000
1	249720001	249840000	120000		10	97140001	97200000	60000
1	249990001	250080000	90000		10	97690001	97770000	80000
1	250600001	250660000	60000		10	97790001	97840000	50000
1	250670001	250810000	140000		10	97910001	97980000	70000
1	251570001	251710000	140000		10	98480001	98740000	260000
1	252010001	252100000	90000		10	98800001	98970000	170000
1	252660001	252730000	70000		10	99960001	100010000	50000
1	252790001	252920000	130000		10	101030001	101090000	60000
1	253030001	253120000	90000		10	102900001	102990000	90000
1	253170001	253230000	60000		10	103340001	103510000	170000
1	253250001	253430000	180000		10	103530001	103780000	250000
1	253450001	253530000	80000		10	104340001	104550000	210000
1	254440001	254510000	70000		10	104850001	104910000	60000
1	254540001	254660000	120000		10	105410001	105470000	60000
1	254980001	255130000	150000		10	105540001	105660000	120000
1	255280001	255430000	150000		10	105790001	106050000	260000
1	255670001	255750000	80000		10	106210001	106300000	90000
1	255820001	256030000	210000		10	106350001	106420000	70000
1	256440001	256520000	80000		10	106810001	106910000	100000
1	256590001	256840000	250000		10	107010001	107130000	120000
1	256880001	256950000	70000		10	107560001	107660000	100000
1	257260001	257400000	140000		10	110420001	110500000	80000
1	258720001	258770000	50000		11	10490001	10570000	80000
1	258830001	258900000	70000		11	10690001	10780000	90000
1	259140001	259240000	100000		11	18990001	19080000	90000
1	259250001	259320000	70000		11	25550001	25640000	90000
1	261550001	261610000	60000		11	25690001	25790000	100000
1	268870001	268920000	50000		11	35120001	35170000	50000
1	269090001	269140000	50000		11	40740001	40820000	80000
1	269620001	269670000	50000		11	40880001	40930000	50000
1	272080001	272150000	70000		11	40940001	41090000	150000
1	273500001	273550000	50000		11	41160001	41250000	90000
1	277200001	277280000	80000		11	41650001	41740000	90000
1	277410001	277500000	90000		11	41860001	41910000	50000
1	277550001	278310000	760000		11	41970001	42040000	70000
1	278400001	278700000	300000		11	42270001	42420000	150000
1	278720001	279300000	580000		11	42480001	42530000	50000
1	279560001	280210000	650000		11	42610001	42670000	60000
1	280230001	281580000	1350000		11	42850001	42900000	50000
1	281740001	281890000	150000		11	42930001	43130000	200000
1	281910001	282160000	250000		11	43610001	43660000	50000
1	282290001	282410000	120000		11	43720001	43940000	220000
1	282440001	282700000	260000		11	44140001	44220000	80000
2	4730001	4780000	50000		11	44250001	44300000	50000
2	8390001	8480000	90000		11	44320001	44410000	90000
2	8720001	8850000	130000		11	44450001	44500000	50000
2	9520001	9580000	60000		11	44880001	44950000	70000
2	13270001	13340000	70000		11	45050001	45110000	60000
2	16030001	16090000	60000		11	45520001	45570000	50000
2	16120001	16170000	50000		11	46360001	46450000	90000
2	16200001	16370000	170000		11	46510001	46570000	60000
2	16380001	16560000	180000		11	46960001	47100000	140000
2	16650001	16750000	100000		11	47150001	47220000	70000
2	16800001	16880000	80000		11	47250001	47360000	110000
2	16940001	17020000	80000		11	48030001	48150000	120000
2	17340001	17400000	60000		11	48190001	48280000	90000
2	18450001	18520000	70000		11	48410001	48470000	60000
2	19250001	19300000	50000		11	48520001	48760000	240000
2	28740001	28840000	100000		11	48790001	48890000	100000
2	28940001	29030000	90000		11	49090001	49180000	90000
2	34030001	34080000	50000		11	49200001	49320000	120000
2	34980001	35030000	50000		11	49550001	49620000	70000
2	45030001	45080000	50000		11	49640001	49690000	50000
2	49930001	49990000	60000		11	49730001	49820000	90000
2	51810001	51860000	50000		11	52360001	52470000	110000
2	57010001	57100000	90000		11	52490001	52590000	100000
2	57220001	57270000	50000		11	53520001	53620000	100000
2	57410001	57460000	50000		11	53690001	53760000	70000
2	57680001	57740000	60000		11	53970001	54070000	100000
2	57780001	57840000	60000		11	54270001	54390000	120000
2	57970001	58050000	80000		11	54400001	54580000	180000
2	58090001	58150000	60000		11	54670001	54730000	60000
2	58210001	58300000	90000		11	54760001	54920000	160000
2	58450001	58540000	90000		11	55410001	55460000	50000
2	58560001	58650000	90000		11	55600001	55670000	70000
2	64850001	64900000	50000		11	55800001	55930000	130000
2	73190001	73270000	80000		11	55970001	56140000	170000
2	80720001	80780000	60000		11	57510001	57580000	70000
2	81800001	81850000	50000		11	60280001	60380000	100000
2	82900001	82980000	80000		11	60440001	60540000	100000
2	95940001	96030000	90000		11	60730001	60820000	90000
2	97780001	97850000	70000		11	60920001	61040000	120000
2	115520001	115570000	50000		11	61120001	61180000	60000
2	120060001	120200000	140000		11	61230001	61350000	120000
2	120240001	120340000	100000		11	61610001	61690000	80000
2	121890001	121940000	50000		11	61980001	62080000	100000
2	121980001	122050000	70000		11	62330001	62380000	50000
2	122160001	122260000	100000		11	72580001	72650000	70000
2	122800001	122850000	50000		11	77170001	77240000	70000
2	142560001	142640000	80000		11	77290001	77380000	90000
2	142890001	142980000	90000		11	77570001	77620000	50000
2	143030001	143160000	130000		11	77700001	77790000	90000
2	143180001	143230000	50000		11	77940001	78020000	80000
2	143270001	143320000	50000		11	81060001	81150000	90000
2	143370001	143460000	90000		12	3120001	3240000	120000
2	145740001	145790000	50000		12	10570001	10660000	90000
2	174980001	175050000	70000		12	11330001	11390000	60000
2	182020001	182070000	50000		12	12320001	12380000	60000
2	184710001	184790000	80000		12	12540001	12610000	70000
2	190860001	190920000	60000		12	15000001	15050000	50000
2	191210001	191290000	80000		12	16740001	16950000	210000
2	191300001	191490000	190000		12	17530001	17580000	50000
2	191640001	191710000	70000		12	18160001	18250000	90000
2	191830001	191910000	80000		12	18260001	18320000	60000
2	192230001	192320000	90000		12	18450001	18510000	60000
2	199830001	199920000	90000		12	18820001	18900000	80000
2	201070001	201160000	90000		12	19320001	19460000	140000
2	201440001	201490000	50000		12	30920001	31170000	250000
2	201530001	201620000	90000		12	48130001	48230000	100000
2	203930001	203980000	50000		12	48410001	48500000	90000
2	207100001	207150000	50000		12	48610001	48730000	120000
2	210180001	210240000	60000		12	49390001	49490000	100000
2	216300001	216360000	60000		12	49640001	49690000	50000
2	216820001	216870000	50000		12	49710001	49780000	70000
2	222880001	222930000	50000		12	49840001	49890000	50000
2	222980001	223070000	90000		12	49960001	50050000	90000
2	225700001	225760000	60000		12	50530001	50610000	80000
2	229200001	229290000	90000		12	50680001	50730000	50000
2	229440001	229690000	250000		12	50740001	50900000	160000
2	229720001	229770000	50000		13	1870001	1960000	90000
2	231490001	231540000	50000		13	2050001	2140000	90000
2	251240001	251290000	50000		13	2530001	2630000	100000
2	252700001	252790000	90000		13	2660001	2750000	90000
2	260310001	260400000	90000		13	2760001	2850000	90000
2	260700001	260790000	90000		13	3080001	3190000	110000
2	260860001	260940000	80000		13	3290001	3370000	80000
2	261130001	261200000	70000		13	3550001	3640000	90000
2	265210001	265320000	110000		13	3810001	3920000	110000
3	9100001	9150000	50000		13	4000001	4060000	60000
3	14410001	14460000	50000		13	4710001	4770000	60000
3	16430001	16610000	180000		13	4900001	4980000	80000
3	16950001	17260000	310000		13	4990001	5060000	70000
3	17270001	17330000	60000		13	5070001	5140000	70000
3	17620001	17690000	70000		13	5300001	5380000	80000
3	17830001	17880000	50000		13	5450001	5590000	140000
3	18330001	18450000	120000		13	5810001	5960000	150000
3	18560001	18880000	320000		13	6610001	6810000	200000
3	18930001	19370000	440000		13	6970001	7080000	110000
3	19490001	19540000	50000		13	7340001	7430000	90000
3	19690001	19790000	100000		13	7510001	7560000	50000
3	19840001	19930000	90000		13	7600001	7690000	90000
3	20030001	20120000	90000		13	7840001	7990000	150000
3	20200001	20250000	50000		13	8010001	8110000	100000
3	20280001	20350000	70000		13	8290001	8380000	90000
3	20360001	20750000	390000		13	8650001	8740000	90000
3	27840001	27890000	50000		13	9830001	9900000	70000
3	28040001	28180000	140000		13	11890001	12030000	140000
3	28290001	28380000	90000		13	12040001	12430000	390000
3	28410001	28460000	50000		13	12570001	12700000	130000
3	28500001	28600000	100000		13	13030001	13200000	170000
3	28720001	28810000	90000		13	13220001	13400000	180000
3	28900001	29000000	100000		13	13440001	13630000	190000
3	29360001	29410000	50000		13	13780001	13970000	190000
3	36820001	36870000	50000		13	14180001	14290000	110000
3	37040001	37120000	80000		13	14560001	14630000	70000
3	37290001	37380000	90000		13	14830001	14970000	140000
3	37450001	37580000	130000		13	15060001	15150000	90000
3	38050001	38140000	90000		13	15280001	15330000	50000
3	38150001	38270000	120000		13	15350001	15500000	150000
3	38290001	38370000	80000		13	15690001	15800000	110000
3	38740001	38830000	90000		13	16320001	16390000	70000
3	38840001	39150000	310000		13	16420001	16490000	70000
3	39190001	39280000	90000		13	16770001	16830000	60000
3	39340001	39430000	90000		13	16850001	16940000	90000
3	39510001	39620000	110000		13	17920001	17970000	50000
3	39630001	39700000	70000		13	17980001	18130000	150000
3	39750001	39910000	160000		13	22210001	22260000	50000
3	40100001	40160000	60000		13	30590001	30670000	80000
3	40530001	40610000	80000		13	41320001	41380000	60000
3	40820001	40880000	60000		13	43620001	43670000	50000
3	42140001	42190000	50000		13	44080001	44150000	70000
3	43970001	44060000	90000		13	44730001	44780000	50000
3	44360001	44510000	150000		13	44970001	45030000	60000
3	44780001	44850000	70000		13	45110001	45200000	90000
3	44980001	45070000	90000		13	45400001	45610000	210000
3	47310001	47520000	210000		13	45650001	45740000	90000
3	47920001	47970000	50000		13	45750001	45810000	60000
3	48000001	48160000	160000		13	45820001	45900000	80000
3	48210001	48270000	60000		13	45940001	46020000	80000
3	48410001	48470000	60000		13	46040001	46120000	80000
3	48810001	48920000	110000		13	46170001	46250000	80000
3	48970001	49020000	50000		13	46470001	46530000	60000
3	49070001	49130000	60000		13	46920001	46990000	70000
3	52610001	52690000	80000		13	47260001	47420000	160000
3	53750001	53800000	50000		13	48920001	48990000	70000
3	55030001	55110000	80000		13	49000001	49070000	70000
3	55420001	55480000	60000		13	49100001	49160000	60000
3	65900001	65950000	50000		13	49760001	49950000	190000
3	67980001	68050000	70000		13	50130001	50210000	80000
3	70890001	70940000	50000		13	50520001	50580000	60000
3	74490001	74570000	80000		13	52360001	52420000	60000
3	76140001	76230000	90000		13	52640001	52730000	90000
3	76700001	76760000	60000		13	54140001	54210000	70000
3	76950001	77010000	60000		13	54440001	54530000	90000
3	77840001	77890000	50000		13	54610001	54690000	80000
3	82110001	82170000	60000		13	55480001	55540000	60000
3	83400001	83450000	50000		13	55590001	55760000	170000
3	83460001	83540000	80000		13	55770001	55840000	70000
3	83610001	83660000	50000		13	55890001	55970000	80000
3	83960001	84010000	50000		13	56530001	56590000	60000
3	84020001	84110000	90000		13	56720001	56830000	110000
3	84170001	84250000	80000		13	56980001	57380000	400000
3	84350001	84460000	110000		13	57430001	57610000	180000
3	84510001	84610000	100000		13	57620001	57810000	190000
3	84750001	84810000	60000		13	58030001	58120000	90000
3	85300001	85390000	90000		13	58380001	58480000	100000
3	85460001	85540000	80000		13	58780001	58830000	50000
3	85560001	85630000	70000		13	58980001	59040000	60000
3	85650001	85700000	50000		13	59230001	59320000	90000
3	85770001	85850000	80000		13	59470001	59560000	90000
3	86130001	86180000	50000		13	59590001	59680000	90000
3	86400001	86520000	120000		13	59950001	60000000	50000
3	90380001	90480000	100000		13	60150001	60210000	60000
3	90880001	90960000	80000		13	60290001	60370000	80000
3	91200001	91290000	90000		13	60390001	60440000	50000
3	105660001	105710000	50000		13	60470001	60720000	250000
3	110510001	110830000	320000		13	60940001	61190000	250000
3	110870001	111360000	490000		13	61220001	61270000	50000
3	111520001	111680000	160000		13	61330001	61380000	50000
3	111900001	112050000	150000		13	61420001	61490000	70000
3	112140001	112370000	230000		13	61720001	61810000	90000
3	112440001	112510000	70000		13	61910001	62020000	110000
3	112650001	112830000	180000		13	62120001	62240000	120000
3	112930001	113620000	690000		13	62300001	62370000	70000
3	114640001	114690000	50000		13	63020001	63120000	100000
3	115250001	115960000	710000		13	63350001	63540000	190000
3	116500001	116830000	330000		13	63590001	63650000	60000
3	116850001	118260000	1410000		13	63690001	63760000	70000
3	118290001	118680000	390000		13	77760001	77810000	50000
3	118830001	119310000	480000		13	77930001	77990000	60000
3	119320001	119830000	510000		13	79010001	79060000	50000
3	119940001	120610000	670000		13	79070001	79170000	100000
3	121050001	121460000	410000		13	79190001	79280000	90000
3	121500001	121710000	210000		13	79320001	79450000	130000
3	122140001	122570000	430000		13	79500001	79550000	50000
3	122700001	122790000	90000		13	79590001	79670000	80000
3	136430001	136630000	200000		13	79680001	79850000	170000
3	136650001	137020000	370000		13	79950001	80000000	50000
3	141460001	141820000	360000		13	85310001	85370000	60000
3	141830001	142030000	200000		13	85630001	85700000	70000
3	142090001	142590000	500000		13	89390001	89490000	100000
3	142780001	143460000	680000		13	91000001	91080000	80000
3	143520001	143580000	60000		13	91450001	91580000	130000
3	143600001	143660000	60000		13	92000001	92080000	80000
3	143690001	143840000	150000		13	92090001	92180000	90000
3	143980001	145450000	1470000		13	93890001	93950000	60000
3	145520001	145900000	380000		13	95730001	95780000	50000
3	146030001	146640000	610000		13	95930001	96020000	90000
3	146920001	147010000	90000		13	96110001	96210000	100000
3	147790001	147870000	80000		13	96250001	96340000	90000
3	149470001	149530000	60000		13	96520001	96590000	70000
3	154500001	154740000	240000		13	96730001	96810000	80000
3	155730001	155940000	210000		13	97130001	97210000	80000
3	156320001	156440000	120000		13	99500001	99590000	90000
3	157740001	157800000	60000		13	99600001	99720000	120000
3	158590001	158660000	70000		13	99920001	100050000	130000
3	158680001	158790000	110000		13	100410001	100520000	110000
3	159140001	159250000	110000		13	100550001	100620000	70000
3	159310001	159430000	120000		13	100640001	100750000	110000
3	160190001	160250000	60000		13	102370001	102420000	50000
3	160380001	160450000	70000		13	102440001	102810000	370000
3	160490001	160610000	120000		13	102970001	103090000	120000
3	161760001	161840000	80000		13	103260001	103340000	80000
3	162270001	162320000	50000		13	104020001	104080000	60000
3	162550001	162640000	90000		13	104190001	104250000	60000
3	162760001	162820000	60000		13	104610001	104740000	130000
3	163230001	163320000	90000		13	105070001	105120000	50000
3	163330001	163420000	90000		13	105130001	105200000	70000
3	164700001	164760000	60000		13	105330001	105480000	150000
3	164850001	164940000	90000		13	105760001	105810000	50000
3	167810001	167890000	80000		13	105860001	105910000	50000
3	167990001	168050000	60000		13	106210001	106420000	210000
3	168060001	168140000	80000		13	106570001	106650000	80000
3	168310001	168360000	50000		13	106870001	106960000	90000
3	170190001	170280000	90000		13	107080001	107150000	70000
3	173220001	173280000	60000		13	110560001	110620000	60000
3	174150001	174240000	90000		13	111140001	111190000	50000
3	174700001	174790000	90000		14	5220001	5270000	50000
3	175010001	175080000	70000		14	8040001	8120000	80000
3	177530001	177590000	60000		14	8150001	8200000	50000
3	177610001	177660000	50000		14	8890001	8940000	50000
4	2890001	2940000	50000		14	12250001	12350000	100000
4	5480001	5570000	90000		14	13310001	13400000	90000
4	6440001	6500000	60000		14	13490001	13620000	130000
4	6890001	6950000	60000		14	21640001	21720000	80000
4	6990001	7070000	80000		14	22280001	22490000	210000
4	7950001	8000000	50000		14	26010001	26090000	80000
4	8300001	8360000	60000		14	28890001	28940000	50000
4	13560001	13710000	150000		14	35930001	35980000	50000
4	18380001	18430000	50000		14	63580001	63630000	50000
4	18930001	19010000	80000		14	64760001	64830000	70000
4	19110001	19160000	50000		14	89540001	89640000	100000
4	19350001	19410000	60000		14	89770001	89950000	180000
4	19430001	19510000	80000		14	90110001	90200000	90000
4	19700001	19860000	160000		14	90250001	90310000	60000
4	19980001	20110000	130000		14	90720001	90770000	50000
4	20560001	20710000	150000		14	90800001	90850000	50000
4	21300001	21370000	70000		14	90940001	91020000	80000
4	21790001	21850000	60000		14	109500001	109570000	70000
4	22200001	22280000	80000		14	112470001	112540000	70000
4	23240001	23300000	60000		15	8900001	9010000	110000
4	25520001	25610000	90000		15	9020001	9230000	210000
4	25640001	25740000	100000		15	9290001	9500000	210000
4	26160001	26210000	50000		15	9550001	9610000	60000
4	26260001	26330000	70000		15	10090001	10180000	90000
4	26350001	26410000	60000		15	10220001	10310000	90000
4	26490001	26840000	350000		15	10420001	10600000	180000
4	26930001	27020000	90000		15	10680001	10760000	80000
4	28550001	28650000	100000		15	10870001	10920000	50000
4	28700001	28770000	70000		15	11590001	11750000	160000
4	28810001	28940000	130000		15	11890001	12070000	180000
4	29200001	29250000	50000		15	12090001	12200000	110000
4	29290001	29340000	50000		15	12230001	12390000	160000
4	43270001	43360000	90000		15	14460001	14550000	90000
4	44070001	44160000	90000		15	14560001	14650000	90000
4	46210001	46300000	90000		15	19720001	19770000	50000
4	46390001	46530000	140000		15	20150001	20220000	70000
4	47910001	47980000	70000		15	20260001	20390000	130000
4	50370001	50460000	90000		15	20670001	20720000	50000
4	50550001	50650000	100000		15	20990001	21060000	70000
4	50700001	50790000	90000		15	23300001	23380000	80000
4	55600001	55670000	70000		15	23540001	23680000	140000
4	59700001	59770000	70000		15	23690001	23820000	130000
4	59880001	59980000	100000		15	23920001	24240000	320000
4	59990001	60060000	70000		15	24710001	24890000	180000
4	71280001	71340000	60000		15	24910001	25090000	180000
4	71370001	71440000	70000		15	25280001	25370000	90000
4	71460001	71520000	60000		15	26140001	26250000	110000
4	72510001	72670000	160000		15	26500001	26590000	90000
4	76870001	76920000	50000		15	28510001	28570000	60000
4	78510001	78590000	80000		15	28680001	28830000	150000
4	84860001	84910000	50000		15	28890001	28980000	90000
4	84980001	85030000	50000		15	29960001	30040000	80000
4	87300001	87400000	100000		15	32930001	33010000	80000
4	89160001	89210000	50000		15	42540001	42630000	90000
4	90120001	90200000	80000		15	42780001	42840000	60000
4	90360001	90420000	60000		15	42860001	42910000	50000
4	93720001	93810000	90000		15	43150001	43260000	110000
4	97260001	97330000	70000		15	43300001	43440000	140000
4	97450001	97500000	50000		15	43520001	43640000	120000
4	97530001	97660000	130000		15	43710001	43780000	70000
4	97860001	97970000	110000		15	52670001	52740000	70000
4	98090001	98170000	80000		15	53400001	53450000	50000
4	98210001	98280000	70000		15	54030001	54100000	70000
4	101600001	101690000	90000		15	54130001	54180000	50000
4	102080001	102220000	140000		15	54220001	54270000	50000
4	102880001	103010000	130000		15	54290001	54380000	90000
4	105620001	105680000	60000		15	54590001	54680000	90000
4	106120001	106250000	130000		15	54710001	54810000	100000
4	106310001	106400000	90000		15	54860001	54940000	80000
4	106440001	106600000	160000		15	55050001	55140000	90000
4	106960001	107010000	50000		15	55450001	55590000	140000
4	107090001	107180000	90000		15	56500001	56580000	80000
4	107370001	107470000	100000		15	56660001	56720000	60000
4	107580001	107820000	240000		15	57090001	57190000	100000
4	108390001	108440000	50000		15	57260001	57390000	130000
4	108600001	108690000	90000		15	57510001	57580000	70000
4	108840001	108930000	90000		15	57820001	57930000	110000
4	109010001	109060000	50000		15	58100001	58170000	70000
4	109260001	109410000	150000		15	58230001	58280000	50000
4	109460001	109600000	140000		15	58310001	58360000	50000
4	109650001	109730000	80000		15	58770001	58860000	90000
4	109960001	110010000	50000		15	59200001	59340000	140000
4	110340001	110390000	50000		15	59360001	59560000	200000
4	110570001	110620000	50000		15	62790001	62840000	50000
4	111750001	111840000	90000		15	62970001	63030000	60000
4	111910001	112070000	160000		15	63380001	63470000	90000
4	112200001	112260000	60000		15	63510001	63580000	70000
4	112440001	112520000	80000		15	64000001	64200000	200000
4	112690001	112770000	80000		15	64270001	64320000	50000
4	113320001	113370000	50000		15	64520001	64610000	90000
4	113710001	113890000	180000		15	64940001	65010000	70000
4	114120001	114170000	50000		15	65400001	65550000	150000
4	114230001	114320000	90000		15	65600001	65690000	90000
4	114460001	114510000	50000		15	65900001	65950000	50000
4	114550001	114620000	70000		15	67060001	67110000	50000
4	114910001	115000000	90000		15	67210001	67300000	90000
4	115010001	115070000	60000		15	67370001	67470000	100000
4	115190001	115350000	160000		15	73370001	73430000	60000
4	115520001	115590000	70000		15	73660001	73870000	210000
4	115770001	115860000	90000		15	74210001	74300000	90000
4	115900001	116010000	110000		15	74900001	74950000	50000
4	116210001	116280000	70000		15	75020001	75180000	160000
4	117040001	117130000	90000		15	75970001	76020000	50000
4	117320001	117410000	90000		15	77200001	77260000	60000
4	117470001	117570000	100000		15	78350001	78440000	90000
4	117900001	117950000	50000		15	78640001	78730000	90000
4	118050001	118140000	90000		15	78740001	78830000	90000
4	125450001	125560000	110000		15	84390001	84450000	60000
4	127030001	127090000	60000		15	84460001	84550000	90000
4	127290001	127350000	60000		15	84660001	84760000	100000
4	127380001	127470000	90000		15	86420001	86630000	210000
4	127620001	127700000	80000		15	87860001	87930000	70000
4	127890001	127950000	60000		15	88060001	88150000	90000
4	128280001	128370000	90000		15	88230001	88320000	90000
4	128830001	128920000	90000		15	88580001	88640000	60000
4	129190001	129280000	90000		15	89140001	89230000	90000
4	129290001	129370000	80000		15	89310001	89400000	90000
4	129400001	129450000	50000		15	91500001	91560000	60000
4	129560001	129670000	110000		15	97820001	97900000	80000
4	134300001	134370000	70000		15	99490001	99540000	50000
4	134910001	135000000	90000		16	1	130000	130000
4	141670001	141730000	60000		16	6380001	6430000	50000
4	142180001	142270000	90000		16	9840001	9890000	50000
4	142760001	142840000	80000		16	15590001	15670000	80000
4	143110001	143190000	80000		16	26560001	26610000	50000
4	148690001	148750000	60000		16	26910001	26960000	50000
4	148980001	149060000	80000		16	35800001	35900000	100000
4	149870001	149980000	110000		16	36440001	36530000	90000
4	150000001	150060000	60000		16	36640001	36700000	60000
4	150080001	150160000	80000		16	37160001	37210000	50000
4	150580001	150670000	90000		16	37410001	37460000	50000
4	150830001	150920000	90000		16	37600001	37690000	90000
4	150930001	151000000	70000		16	41670001	41730000	60000
4	151530001	151610000	80000		16	42770001	42830000	60000
4	151820001	151910000	90000		16	58700001	58770000	70000
4	152990001	153110000	120000		16	59710001	59950000	240000
4	153130001	153220000	90000		16	60000001	60050000	50000
4	153820001	153880000	60000		16	60060001	60110000	50000
4	154160001	154210000	50000		16	60440001	60590000	150000
4	154250001	154310000	60000		16	61110001	61180000	70000
4	154690001	154790000	100000		16	61210001	61260000	50000
4	154830001	154920000	90000		16	61330001	61410000	80000
4	158630001	158730000	100000		16	61510001	61570000	60000
4	159050001	159130000	80000		16	61740001	61790000	50000
4	169880001	169970000	90000		16	61900001	61960000	60000
4	171130001	171260000	130000		16	62100001	62150000	50000
4	171520001	171580000	60000		16	62180001	62350000	170000
4	171670001	171720000	50000		16	62370001	62560000	190000
4	171770001	171820000	50000		16	62670001	62760000	90000
4	179120001	179210000	90000		16	62770001	62880000	110000
4	179270001	179370000	100000		16	63060001	63130000	70000
4	179500001	179550000	50000		16	63370001	63420000	50000
4	179610001	179660000	50000		16	63500001	63640000	140000
4	179740001	179830000	90000		16	63670001	63720000	50000
4	180320001	180520000	200000		16	64200001	64290000	90000
4	180600001	180740000	140000		16	64970001	65030000	60000
4	181280001	181350000	70000		16	66120001	66170000	50000
4	181390001	181540000	150000		16	66750001	66800000	50000
4	181770001	181870000	100000		16	66850001	66970000	120000
4	182380001	182430000	50000		16	67030001	67090000	60000
4	182770001	182950000	180000		16	67230001	67320000	90000
4	183070001	183140000	70000		16	67510001	67560000	50000
4	183350001	183400000	50000		16	79490001	79540000	50000
4	183740001	183880000	140000		16	79990001	80080000	90000
4	184040001	184110000	70000		16	80250001	80310000	60000
5	690001	740000	50000		16	80370001	80420000	50000
5	850001	910000	60000		16	80440001	80490000	50000
5	1030001	1110000	80000		16	81130001	81180000	50000
5	1200001	1250000	50000		16	81240001	81290000	50000
5	1260001	1330000	70000		16	81360001	81460000	100000
5	3580001	3640000	60000		16	81500001	81550000	50000
5	6210001	6270000	60000		16	81620001	81680000	60000
5	13520001	13640000	120000		16	81870001	81950000	80000
5	15400001	15450000	50000		16	82880001	82930000	50000
5	17110001	17550000	440000		16	84310001	84370000	60000
5	17700001	17820000	120000		16	88980001	89100000	120000
5	17850001	18520000	670000		16	89570001	89630000	60000
5	18740001	19090000	350000		16	90220001	90310000	90000
5	19200001	19350000	150000		16	90450001	90530000	80000
5	20630001	20690000	60000		16	90610001	90668790	58790
5	20950001	21040000	90000		17	9180001	9240000	60000
5	21270001	21350000	80000		17	14910001	15010000	100000
5	22260001	22320000	60000		17	21450001	21540000	90000
5	22640001	22770000	130000		17	27420001	27500000	80000
5	23070001	23120000	50000		17	27770001	27860000	90000
5	24650001	24890000	240000		17	27990001	28060000	70000
5	24900001	25050000	150000		17	29570001	29620000	50000
5	25170001	25280000	110000		17	31590001	31640000	50000
5	25320001	25410000	90000		17	31770001	31820000	50000
5	27620001	27860000	240000		17	43710001	43760000	50000
5	28550001	28640000	90000		17	69170001	69240000	70000
5	28850001	28910000	60000		17	69290001	69340000	50000
5	28930001	29020000	90000		17	69570001	69630000	60000
5	29070001	29170000	100000		17	70020001	70240000	220000
5	29730001	29790000	60000		17	70320001	70410000	90000
5	29890001	29980000	90000		17	70530001	70690000	160000
5	30180001	30300000	120000		17	71000001	71090000	90000
5	30410001	30490000	80000		17	71120001	71190000	70000
5	30740001	30790000	50000		17	71320001	71570000	250000
5	33710001	33790000	80000		17	71580001	71680000	100000
5	38190001	38240000	50000		17	72150001	72210000	60000
5	69560001	69620000	60000		17	72620001	72710000	90000
5	69780001	69870000	90000		17	72920001	73090000	170000
5	89370001	89420000	50000		17	73300001	73350000	50000
5	91220001	91300000	80000		17	73580001	73670000	90000
5	91590001	91640000	50000		17	73760001	73810000	50000
5	131970001	132190000	220000		17	73830001	73920000	90000
5	134220001	134270000	50000		17	78040001	78090000	50000
5	137560001	137630000	70000		17	78160001	78260000	100000
5	137800001	137870000	70000		17	78470001	78520000	50000
5	150690001	150740000	50000		17	78580001	78670000	90000
5	150790001	150870000	80000		17	78690001	78760000	70000
5	151030001	151100000	70000		17	78790001	78910000	120000
5	151500001	151610000	110000		17	79270001	79320000	50000
5	151730001	151810000	80000		17	79650001	79700000	50000
5	152060001	152220000	160000		17	83780001	83830000	50000
5	152230001	152280000	50000		17	86790001	86860000	70000
5	152300001	152350000	50000		17	90680001	90750000	70000
5	152380001	152470000	90000		18	20001	70000	50000
5	152680001	153000000	320000		18	1680001	1790000	110000
5	153160001	153420000	260000		18	1840001	1920000	80000
5	153740001	153840000	100000		18	1950001	2040000	90000
5	153940001	154000000	60000		18	2100001	2200000	100000
5	154010001	154150000	140000		18	2610001	2680000	70000
5	156320001	156390000	70000		18	3240001	3370000	130000
5	162580001	162840000	260000		18	3490001	3690000	200000
5	163080001	163200000	120000		18	4710001	4890000	180000
5	163460001	163530000	70000		18	5330001	5420000	90000
5	164350001	164470000	120000		18	5930001	6000000	70000
5	164830001	165010000	180000		18	6750001	6800000	50000
5	165210001	165260000	50000		18	6980001	7270000	290000
5	165620001	165760000	140000		18	7780001	7880000	100000
5	166280001	166370000	90000		18	19440001	19490000	50000
5	166640001	166890000	250000		18	24670001	24760000	90000
5	167080001	167140000	60000		18	25340001	25460000	120000
5	167230001	167280000	50000		18	25660001	25930000	270000
5	167380001	167460000	80000		18	26040001	26130000	90000
5	167960001	168050000	90000		18	26140001	26190000	50000
5	169250001	169360000	110000		18	26200001	26270000	70000
5	169620001	169710000	90000		18	26460001	26580000	120000
5	169910001	170000000	90000		18	26640001	26730000	90000
5	170030001	170090000	60000		18	26760001	26830000	70000
5	170430001	170550000	120000		18	27640001	27690000	50000
6	2160001	2310000	150000		18	28340001	28410000	70000
6	2380001	2480000	100000		18	28440001	28520000	80000
6	2920001	2980000	60000		18	29490001	29610000	120000
6	3460001	3570000	110000		18	30760001	30810000	50000
6	3920001	4000000	80000		18	30880001	30950000	70000
6	4040001	4110000	70000		18	31100001	31160000	60000
6	4140001	4230000	90000		18	31370001	31440000	70000
6	4250001	4470000	220000		18	31520001	31590000	70000
6	4560001	4630000	70000		18	31630001	31720000	90000
6	4770001	5010000	240000		18	32090001	32180000	90000
6	5070001	5160000	90000		18	32640001	32700000	60000
6	5380001	5490000	110000		18	33220001	33300000	80000
6	5690001	5870000	180000		18	33310001	33370000	60000
6	5920001	5970000	50000		18	33530001	33620000	90000
6	5980001	6070000	90000		18	33760001	33850000	90000
6	6110001	6230000	120000		18	33910001	33970000	60000
6	6240001	6300000	60000		18	41270001	41350000	80000
6	6350001	6530000	180000		18	41530001	41620000	90000
6	16890001	16940000	50000		18	42150001	42220000	70000
6	19270001	19320000	50000		18	42350001	42420000	70000
6	20310001	20370000	60000		18	42630001	42720000	90000
6	21120001	21210000	90000		18	42980001	43030000	50000
6	22680001	22760000	80000		18	43090001	43200000	110000
6	23320001	23410000	90000		18	43640001	43720000	80000
6	23510001	23590000	80000		18	50260001	50310000	50000
6	23980001	24080000	100000		18	50830001	50910000	80000
6	24220001	24270000	50000		18	52270001	52370000	100000
6	24800001	24890000	90000		18	53520001	53640000	120000
6	25320001	25440000	120000		18	53760001	53830000	70000
6	25630001	25800000	170000		18	54030001	54110000	80000
6	26010001	26110000	100000		18	54770001	54920000	150000
6	26250001	26300000	50000		18	54960001	55050000	90000
6	26310001	26380000	70000		18	55320001	55380000	60000
6	26520001	26600000	80000		18	55680001	55900000	220000
6	26660001	26740000	80000		18	56460001	56620000	160000
6	26980001	27050000	70000		18	56670001	56750000	80000
6	27570001	27620000	50000		18	56800001	56890000	90000
6	27910001	27960000	50000		18	56910001	56980000	70000
6	28150001	28240000	90000		18	56990001	57130000	140000
6	28310001	28400000	90000		18	57170001	57370000	200000
6	28430001	28520000	90000		18	57470001	57540000	70000
6	28630001	28680000	50000		18	59610001	59680000	70000
6	28820001	28870000	50000		18	60010001	60060000	50000
6	29990001	30080000	90000		18	60090001	60150000	60000
6	36710001	36780000	70000		18	61570001	61630000	60000
6	47550001	47600000	50000		18	62310001	62460000	150000
6	47770001	47960000	190000		18	62470001	62560000	90000
6	47990001	48040000	50000		18	67320001	67400000	80000
6	48200001	48270000	70000		18	67410001	67460000	50000
6	59920001	60000000	80000		18	72260001	72310000	50000
6	60460001	60520000	60000		18	72400001	72460000	60000
6	60610001	60700000	90000		18	72470001	72560000	90000
6	61850001	61930000	80000		18	76830001	76930000	100000
6	62160001	62250000	90000		18	77980001	78040000	60000
6	62290001	62380000	90000		18	78080001	78130000	50000
6	66240001	66330000	90000		18	79170001	79330000	160000
6	66470001	66540000	70000		18	79370001	79420000	50000
6	81470001	81550000	80000		18	79520001	79650000	130000
6	81600001	81660000	60000		18	79660001	79750000	90000
6	83090001	83150000	60000		18	79900001	80020000	120000
6	83190001	83260000	70000		18	80080001	80140000	60000
6	94580001	94670000	90000		18	80390001	80450000	60000
6	103720001	103770000	50000		18	80550001	80610000	60000
6	105470001	105520000	50000		18	84520001	84610000	90000
6	122290001	122340000	50000		18	84700001	84760000	60000
6	122820001	122950000	130000		18	84830001	84930000	100000
6	126740001	126820000	80000		18	85130001	85200000	70000
6	126960001	127060000	100000		18	85360001	85410000	50000
6	127320001	127400000	80000		18	85440001	85530000	90000
6	127720001	127860000	140000		18	85550001	85620000	70000
6	127910001	127990000	80000		18	85640001	85740000	100000
6	128120001	128200000	80000		18	86060001	86120000	60000
6	128470001	128670000	200000		18	86300001	86350000	50000
6	128740001	128840000	100000		18	86850001	86970000	120000
6	129330001	129450000	120000		18	87280001	87350000	70000
6	132610001	132690000	80000		18	87610001	87680000	70000
6	133170001	133250000	80000		19	630001	740000	110000
6	133260001	133350000	90000		19	2260001	2310000	50000
6	133360001	133410000	50000		19	2440001	2530000	90000
6	134220001	134270000	50000		19	2780001	2830000	50000
6	134420001	134470000	50000		19	2940001	3030000	90000
6	134570001	134620000	50000		19	3180001	3240000	60000
6	136500001	136590000	90000		19	3270001	3320000	50000
6	137440001	137520000	80000		19	3460001	3590000	130000
6	137540001	137600000	60000		19	3660001	3710000	50000
6	142000001	142050000	50000		19	3720001	3870000	150000
6	142850001	143050000	200000		19	4050001	4140000	90000
6	143120001	143210000	90000		19	4310001	4380000	70000
6	143530001	143610000	80000		19	4400001	4490000	90000
6	143710001	143820000	110000		19	4670001	4770000	100000
6	143840001	143930000	90000		19	4780001	4840000	60000
6	144580001	144660000	80000		19	5310001	5520000	210000
6	144810001	144960000	150000		19	5860001	5950000	90000
6	145440001	145520000	80000		19	6150001	6230000	80000
6	145550001	145660000	110000		19	6770001	6830000	60000
7	2390001	2500000	110000		19	6840001	6930000	90000
7	3840001	3900000	60000		19	6950001	7040000	90000
7	4160001	4270000	110000		19	7340001	7400000	60000
7	4310001	4390000	80000		19	7590001	7680000	90000
7	4490001	4730000	240000		19	8070001	8270000	200000
7	4800001	5050000	250000		19	8380001	8450000	70000
7	5060001	5430000	370000		19	9140001	9200000	60000
7	5530001	5620000	90000		19	12690001	12770000	80000
7	5650001	5720000	70000		19	15420001	15470000	50000
7	5730001	6040000	310000		19	15490001	15540000	50000
7	6360001	6610000	250000		19	19370001	19420000	50000
7	6710001	6780000	70000		19	19760001	19920000	160000
7	9480001	9530000	50000		19	22870001	22940000	70000
7	9770001	9820000	50000		19	23890001	23980000	90000
7	10320001	10410000	90000		19	24000001	24050000	50000
7	11760001	11810000	50000		19	29670001	29730000	60000
7	12290001	12340000	50000		19	33990001	34040000	50000
7	13110001	13200000	90000		19	35710001	35770000	60000
7	13400001	13490000	90000		19	38660001	38740000	80000
7	13560001	13640000	80000		19	38950001	39020000	70000
7	13670001	13720000	50000		19	40420001	40480000	60000
7	15440001	15560000	120000		19	42630001	42690000	60000
7	16540001	16640000	100000		19	45590001	45770000	180000
7	17980001	18050000	70000		19	45780001	45860000	80000
7	18240001	18320000	80000		19	45900001	46050000	150000
7	19380001	19430000	50000		19	47490001	47560000	70000
7	19700001	19800000	100000		19	48120001	48240000	120000
7	20060001	20120000	60000		19	48440001	48620000	180000
7	20200001	20300000	100000		19	48650001	48740000	90000
7	20690001	20790000	100000		19	48750001	48810000	60000
7	22940001	23030000	90000		19	48940001	49040000	100000
7	23590001	23640000	50000		19	49250001	49320000	70000
7	35200001	35250000	50000		19	49350001	49480000	130000
7	44260001	44310000	50000		19	49740001	49790000	50000
7	52870001	52920000	50000		19	49940001	50030000	90000
7	54760001	54910000	150000		19	50150001	50230000	80000
7	55160001	55280000	120000		19	50420001	50500000	80000
7	55480001	55570000	90000		19	50550001	50670000	120000
7	55780001	55970000	190000		19	52200001	52260000	60000
7	56290001	56410000	120000		19	54490001	54540000	50000
7	56490001	56540000	50000		19	54620001	54700000	80000
7	56590001	56650000	60000		19	54710001	54770000	60000
7	56680001	56740000	60000		19	54980001	55060000	80000
7	61360001	61540000	180000		19	55330001	55460000	130000
7	61580001	61760000	180000		19	55500001	55550000	50000
7	62040001	62130000	90000		19	55900001	56000000	100000
7	62250001	62380000	130000		19	56050001	56100000	50000
7	62480001	62530000	50000		19	56630001	56690000	60000
7	64650001	64720000	70000		19	59210001	59260000	50000
7	68680001	68750000	70000		19	59700001	59770000	70000
7	68820001	68970000	150000		19	59850001	59950000	100000
7	71730001	71860000	130000		19	60280001	60330000	50000
7	72110001	72200000	90000		20	100001	180000	80000
7	72210001	72290000	80000		20	560001	610000	50000
7	72390001	72550000	160000		20	620001	710000	90000
7	73330001	73440000	110000		20	740001	870000	130000
7	73760001	73810000	50000		20	1120001	1210000	90000
7	73820001	73900000	80000		20	2950001	3020000	70000
7	73920001	74000000	80000		20	3040001	3170000	130000
7	74150001	74240000	90000		20	3640001	3720000	80000
7	74250001	74340000	90000		20	4070001	4120000	50000
7	74390001	74480000	90000		20	9130001	9180000	50000
7	74970001	75020000	50000		20	9380001	9490000	110000
7	75150001	75240000	90000		20	11410001	11460000	50000
7	76300001	76380000	80000		20	11700001	11790000	90000
7	76420001	76500000	80000		20	12710001	12900000	190000
7	76570001	76640000	70000		20	13430001	13510000	80000
7	77010001	77190000	180000		20	13550001	13690000	140000
7	77230001	77280000	50000		20	13710001	13810000	100000
7	77390001	77440000	50000		20	15540001	15590000	50000
7	77620001	77700000	80000		20	17650001	17810000	160000
7	77720001	77790000	70000		20	18070001	18130000	60000
7	77900001	77990000	90000		20	18180001	18310000	130000
7	78040001	78090000	50000		20	20480001	20830000	350000
7	78270001	78320000	50000		20	21750001	21840000	90000
7	78340001	78430000	90000		20	22020001	22070000	50000
7	78830001	78920000	90000		20	22080001	22150000	70000
7	79300001	79390000	90000		20	22230001	22300000	70000
7	79590001	79650000	60000		20	22400001	22480000	80000
7	79870001	79940000	70000		20	22670001	22760000	90000
7	80090001	80160000	70000		20	22880001	22970000	90000
7	80220001	80310000	90000		20	23010001	23090000	80000
7	80470001	80530000	60000		20	23130001	23330000	200000
7	80550001	80630000	80000		20	23500001	23620000	120000
7	80810001	80900000	90000		20	23690001	23920000	230000
7	81000001	81060000	60000		20	24040001	24090000	50000
7	81620001	81700000	80000		20	24150001	24240000	90000
7	82920001	82980000	60000		20	24280001	24340000	60000
7	85830001	85920000	90000		20	24450001	24510000	60000
7	89330001	89390000	60000		20	24770001	24860000	90000
7	95140001	95230000	90000		20	24960001	25170000	210000
7	95260001	95320000	60000		20	31910001	31970000	60000
7	95340001	95470000	130000		20	35470001	35520000	50000
7	95550001	95630000	80000		20	38240001	38300000	60000
7	96720001	96840000	120000		20	38540001	38680000	140000
7	97500001	97570000	70000		20	38710001	38800000	90000
7	97630001	97700000	70000		20	38940001	39000000	60000
7	97980001	98060000	80000		20	40670001	40730000	60000
7	98210001	98260000	50000		20	40750001	40850000	100000
7	98400001	98490000	90000		20	42300001	42370000	70000
7	108230001	108280000	50000		20	44760001	44840000	80000
7	137320001	137390000	70000		20	45780001	45840000	60000
7	143130001	143210000	80000		20	48790001	48870000	80000
8	7920001	7980000	60000		20	48930001	49050000	120000
8	10010001	10070000	60000		20	50160001	50210000	50000
8	15880001	15960000	80000		20	50260001	50340000	80000
8	16010001	16100000	90000		20	52080001	52150000	70000
8	16540001	16630000	90000		20	52810001	52860000	50000
8	16860001	16930000	70000		20	52950001	53050000	100000
8	17160001	17250000	90000		20	54600001	54660000	60000
8	17540001	17750000	210000		X	4750001	4820000	70000
8	17770001	17820000	50000		X	5460001	5530000	70000
8	18130001	18270000	140000		X	6000001	6090000	90000
8	18420001	18500000	80000		X	9150001	9240000	90000
8	18520001	18630000	110000		X	9650001	9700000	50000
8	19010001	19100000	90000		X	9820001	9910000	90000
8	19620001	19750000	130000		X	10170001	10230000	60000
8	19780001	19870000	90000		X	10540001	10620000	80000
8	19910001	19990000	80000		X	10720001	10780000	60000
8	20140001	20310000	170000		X	11150001	11240000	90000
8	20360001	20730000	370000		X	14700001	14830000	130000
8	20780001	20880000	100000		X	15900001	15990000	90000
8	20950001	21040000	90000		X	16390001	16470000	80000
8	21130001	21470000	340000		X	23080001	23160000	80000
8	21530001	21600000	70000		X	30250001	30340000	90000
8	21760001	21930000	170000		X	30670001	30760000	90000
8	21940001	22140000	200000		X	31050001	31140000	90000
8	22310001	22380000	70000		X	31190001	31280000	90000
8	22890001	22940000	50000		X	31680001	31760000	80000
8	22960001	23010000	50000		X	31950001	32000000	50000
8	23200001	23330000	130000		X	81180001	81270000	90000
8	28750001	28820000	70000		X	81440001	81490000	50000
8	29260001	29390000	130000		X	85460001	85510000	50000
8	32070001	32200000	130000		X	86790001	86880000	90000
8	35780001	35840000	60000		X	88080001	88130000	50000
8	51800001	51870000	70000		X	106470001	106530000	60000
8	52330001	52390000	60000		X	107640001	107700000	60000
					X	116860001	116910000	50000
