# Supplementary material for: Integrative Analysis of Genome and Expression Profile Data Reveals the Genetic Mechanism of the Diabetic Pathogenesis in Goto Kakizaki (GK) Rats
Source: Front Genet. 2019 Jan 10;9:724. doi: 10.3389/fgene.2018.00724 (PMC6335273; doi:10.3389/fgene.2018.00724)
Supplement: TABLE S3 — The information of PASS regions overlap with QTLs related to GK rat or T2D. [file Table_3.XLSX]

## Sheet: Sheet1
chr	QTL start	QTL end	QTL length	PASS overlap length	overlap/pass length	QTL name	QTL related phenotype
1	281795624	282763074	967450	780000	0.8062	Bw115	body weight (CMO:0000012)
1	225689973	247836969	22146996	5170000	0.2334	Niddm4	plasma glucose level (CMO:0000042)
1	244992467	282365384	37372917	8680000	0.2323	Niddm58	body weight (CMO:0000012)
1	244087148	282763074	38675926	8940000	0.2312	Bw123	body weight (CMO:0000012)
1	244401175	282365384	37964209	8680000	0.2286	Bw116	abdominal fat weight (CMO:0000313)
1	236763415	258766873	22003458	4940000	0.2245	Niddm7	plasma glucose level (CMO:0000042)
3	99465522	168732722	69267200	15470000	0.2233	Niddm39	blood glucose level (CMO:0000046)
1	217054291	281795785	64741494	14130000	0.2183	Niddm43	blood glucose level (CMO:0000046)
1	236795785	281795785	45000000	9470000	0.2104	Niddm24	blood glucose level area under curve (AUC) (CMO:0000350)
1	235850810	280850810	45000000	9320000	0.2071	Niddm59	body weight (CMO:0000012)
1	213476630	278978026	65501396	11980000	0.1829	Niddm67;Niddm69	blood glucose level area under curve (AUC) (CMO:0000350);plasma insulin level (CMO:0000342)
5	150360936	167946134	17585198	3160000	0.1797	Bmd78	total volumetric bone mineral density (CMO:0001728)
1	249607907	266793958	17186051	2920000	0.1699	Gluco57	blood glucose level (CMO:0000046)
1	238830408	266793958	27963550	4630000	0.1656	Niddm1	blood glucose level (CMO:0000046)
1	205195290	250195290	45000000	7350000	0.1633	Niddm35;Niddm36	serum insulin level (CMO:0000358);calculated pancreatic islet insulin release measurement (CMO:0001217)
11	44444347	69649708	25205361	4040000	0.1603	Niddm50	plasma glucose level (CMO:0000042)
3	28136728	51687917	23551189	3590000	0.1524	Bmd76;Bmd77;Bss72;Bss74	total volumetric bone mineral density (CMO:0001728);cortical volumetric bone mineral density (CMO:0001730);tibia midshaft cross-sectional area (CMO:0001717);tibia total energy absorbed before break (CMO:0001736)
10	91689348	112626471	20937123	2960000	0.1414	Niddm49	plasma glucose level (CMO:0000042)
1	198585664	236763415	38177751	5220000	0.1367	Pancm1	pancreatic islet damage composite score (CMO:0001156)
5	3251329	26252076	23000747	3080000	0.1339	Bss59	tibia midshaft total cross-sectional area (CMO:0001715)
1	194554354	239554354	45000000	5960000	0.1324	Niddm70	plasma insulin level (CMO:0000342)
3	39773247	51687917	11914670	1570000	0.1318	Bmd81	total volumetric bone mineral density (CMO:0001728)
8	54065044	89058369	34993325	4590000	0.1312	Bss100;Bss60;Bss89	tibia area measurement (CMO:0001382);tibia length (CMO:0000450);tibia cortical bone volume (CMO:0001725)
10	80239190	112626471	32387281	4140000	0.1278	Pancm2	ratio of insulin-positive cell area to total area of splenic region of pancreas (CMO:0001814)
15	1105890	15828368	14722478	1870000	0.127	Bss98	tibia ultimate force (CMO:0001734)
8	39958022	84958022	45000000	5040000	0.112	Niddm11	plasma insulin level (CMO:0000342)
10	65992275	110992275	45000000	4950000	0.11	Bss79;Bss80	tibia midshaft cross-sectional area (CMO:0001717);tibia midshaft endosteal cross-sectional area (CMO:0001716)
18	14678852	59678852	45000000	4820000	0.1071	Bss85	tibia midshaft total cross-sectional area (CMO:0001715)
15	15828242	60828242	45000000	4820000	0.1071	Bss103	tibia total energy absorbed before break (CMO:0001736)
8	50529563	106506973	55977410	5850000	0.1045	Bw23	body weight (CMO:0000012)
1	269633949	270137485	503536	50000	0.0993	Niddm65	blood glucose level (CMO:0000046)
1	268570074	269078983	508909	50000	0.0982	Niddm64	blood glucose level (CMO:0000046)
4	1	29778604	29778603	2840000	0.0954	Gluco4	adipocyte maximal glucose uptake to basal glucose uptake ratio (CMO:0000874)
5	4525738	47978104	43452366	4130000	0.095	Niddm10	plasma glucose level (CMO:0000042)
20	5875448	18739210	12863762	1210000	0.0941	Insul2	plasma insulin level (CMO:0000342)
8	33558660	89058369	55499709	5170000	0.0932	Bss75;Bss76;Bss77;Bss78	body length, nose to rump (CMO:0000079);tibia midshaft cross-sectional area (CMO:0001717);tibia midshaft endosteal cross-sectional area (CMO:0001716);tibia total energy absorbed before break (CMO:0001736)
3	1	37891710	37891709	3510000	0.0926	Bss95	tibia-fibula cross-sectional area (CMO:0001718)
8	39230130	106506973	67276843	5850000	0.087	Niddm61	plasma insulin level (CMO:0000342)
9	25692342	92741406	67049064	5670000	0.0846	Niddm26	blood glucose level area under curve (AUC) (CMO:0000350)
1	16143143	49547474	33404331	2790000	0.0835	Bss101;Bss102	tibia ultimate force (CMO:0001734);tibia stiffness (CMO:0001735)
1	215494321	218614387	3120066	260000	0.0833	Insul19	plasma insulin level (CMO:0000342)
7	55072862	123602998	68530136	5680000	0.0829	Pur22;Rf58;Stl24	urine protein level (CMO:0000591);index of glomerular damage (CMO:0001135);plasma triglyceride level (CMO:0000548)
4	7850904	182171018	174320114	13570000	0.0778	Gluco58	blood glucose level (CMO:0000046)
8	33558764	113580387	80021623	5910000	0.0739	Scl66	plasma total cholesterol level (CMO:0000585)
15	68366508	81255430	12888922	950000	0.0737	Bss65	tibia midshaft total cross-sectional area (CMO:0001715)
10	64648311	85513822	20865511	1520000	0.0728	Niddm3	blood glucose level (CMO:0000046)
1	1	34993530	34993529	2530000	0.0723	Bmd69;Bss51;Bss52	cortical volumetric bone mineral density (CMO:0001730);tibia length (CMO:0000450);body length (CMO:0000013)
1	83656882	126240667	42583785	2970000	0.0697	Bmd74	total volumetric bone mineral density (CMO:0001728)
8	46588437	54065241	7476804	520000	0.0695	Bmd84	bone mineral content (CMO:0001554)
10	14827894	110992275	96164381	6430000	0.0669	Gluco60	blood glucose level (CMO:0000046)
10	85513822	95638337	10124515	600000	0.0593	Bss91	tibia midshaft total cross-sectional area (CMO:0001715)
13	79567081	86833540	7266459	430000	0.0592	Niddm72	blood glucose level area under curve (AUC) (CMO:0000350)
1	11314489	83657083	72342594	4140000	0.0572	Bmd72;Bmd73;Bss66;Bss67;Bss69	total volumetric bone mineral density (CMO:0001728);cortical volumetric bone mineral density (CMO:0001730);tibia length (CMO:0000450);tibia total energy absorbed before break (CMO:0001736);bone polar moment of inertia (CMO:0001558)
7	71448715	145729302	74280587	4220000	0.0568	Niddm19	blood glucose level area under curve (AUC) (CMO:0000350)
16	20755556	80316424	59560868	3280000	0.0551	Niddm29	blood glucose level area under curve (AUC) (CMO:0000350)
1	86776571	131776571	45000000	2380000	0.0529	Scort2	plasma corticosterone level (CMO:0001173)
1	43579208	126240667	82661459	4360000	0.0527	Bmd70;Bss53;Bss54;Bss56;Bss57;Bss58	cortical volumetric bone mineral density (CMO:0001730);tibia length (CMO:0000450);tibia midshaft cross-sectional area (CMO:0001717);tibia midshaft endosteal cross-sectional area (CMO:0001716);bone polar moment of inertia (CMO:0001558);tibia total energy absorbed before break (CMO:0001736)
1	144723107	174343537	29620430	1560000	0.0527	Niddm40	plasma glucose level (CMO:0000042)
12	14419775	52716770	38296995	1950000	0.0509	Bw120	body mass index (BMI) (CMO:0000105)
X	1838166	24331837	22493671	1130000	0.0502	Gluco15	blood glucose level area under curve (AUC) (CMO:0000350)
7	5911477	50911477	45000000	2250000	0.05	Bw19	body weight (CMO:0000012)
2	221880206	235570970	13690764	640000	0.0467	Gluco14	blood glucose level area under curve (AUC) (CMO:0000350)
10	19958696	21524070	1565374	70000	0.0447	Bmd80;Bw96	total volumetric bone mineral density (CMO:0001728);body weight (CMO:0000012)
1	139523928	170246858	30722930	1360000	0.0443	Gluco13	blood glucose level area under curve (AUC) (CMO:0000350)
1	49578693	217054291	167475598	7190000	0.0429	Niddm44	blood glucose level (CMO:0000046)
1	124090312	169090312	45000000	1800000	0.04	Bss71	tibia midshaft total cross-sectional area (CMO:0001715)
19	10739929	26201726	15461797	600000	0.0388	Niddm38	blood glucose level (CMO:0000046)
4	31554484	51311866	19757382	760000	0.0385	Niddm71	blood glucose level area under curve (AUC) (CMO:0000350)
5	1	136640934	136640933	5100000	0.0373	Niddm25	blood glucose level (CMO:0000046)
1	53851348	83657083	29805735	1000000	0.0336	Bss86;Bss87	tibia midshaft total cross-sectional area (CMO:0001715);tibia-fibula cortical bone endosteal cross-sectional area (CMO:0001722)
1	99983293	216325819	116342526	3810000	0.0327	Niddm23	blood glucose level (CMO:0000046)
4	55324857	79575658	24250801	790000	0.0326	Bmd86;Bmd87;Bss96;Bss97	bone mineral density (CMO:0001226);bone mineral content (CMO:0001554);tibia cortical bone volume (CMO:0001725);tibia total bone volume (CMO:0001724)
14	2227825	19230541	17002716	550000	0.0323	Niddm20	blood glucose level area under curve (AUC) (CMO:0000350)
14	87458772	106641756	19182984	610000	0.0318	Bss92	tibia-fibula cortical bone total cross-sectional area (CMO:0001721)
1	206950905	218614387	11663482	370000	0.0317	Insul18	plasma insulin level (CMO:0000342)
14	2227825	12680613	10452788	330000	0.0316	Niddm15	plasma glucose level (CMO:0000042)
1	156446783	188289244	31842461	990000	0.0311	Niddm45	plasma glucose level (CMO:0000042)
1	49547328	83657083	34109755	1050000	0.0308	Bss94	tibia-fibula cortical bone endosteal cross-sectional area (CMO:0001722)
2	159585731	204585731	45000000	1140000	0.0253	Niddm2	blood glucose level (CMO:0000046)
2	158159186	217498710	59339524	1360000	0.0229	Niddm62	plasma insulin level (CMO:0000342)
11	62653365	86714483	24061118	540000	0.0224	Niddm22	plasma glucose level (CMO:0000042)
7	93726906	138726906	45000000	960000	0.0213	Niddm14	plasma glucose level (CMO:0000042)
16	5013802	52144919	47131117	840000	0.0178	Niddm6	plasma glucose level (CMO:0000042)
17	1	38243814	38243813	640000	0.0167	Niddm41	plasma glucose level (CMO:0000042)
14	12680424	106641756	93961332	1420000	0.0151	Niddm37	blood glucose level (CMO:0000046)
7	32426296	35867908	3441612	50000	0.0145	Bw119	abdominal fat pad weight to body weight ratio (CMO:0000095)
17	22136814	53475276	31338462	440000	0.014	Niddm32	blood glucose level area under curve (AUC) (CMO:0000350)
X	18153352	63153352	45000000	570000	0.0127	Niddm16	plasma glucose level (CMO:0000042)
12	22876297	43799153	20922856	250000	0.0119	Niddm27	blood glucose level (CMO:0000046)
2	60325352	106432915	46107563	480000	0.0104	Bmd82;Bmd85	bone mineral content (CMO:0001554);bone mineral density (CMO:0001226)
5	61086653	93273130	32186477	330000	0.0103	Rf57	index of glomerular damage (CMO:0001135)
17	27690959	63994435	36303476	360000	0.0099	Bss93	tibia cortical bone volume to tibia total bone volume ratio (CMO:0001727)
10	5460119	21524070	16063951	140000	0.0087	Bmd71;Bss61;Bss63;Bss64	cortical volumetric bone mineral density (CMO:0001730);tibia midshaft cross-sectional area (CMO:0001717);bone polar moment of inertia (CMO:0001558);tibia total energy absorbed before break (CMO:0001736)
2	231224020	254132424	22908404	190000	0.0083	Bmd75	total volumetric bone mineral density (CMO:0001728)
5	61086653	117554114	56467461	330000	0.0058	Pur21	urine protein level (CMO:0000591)
5	35661945	117554267	81892322	380000	0.0046	Gluco59	blood glucose level (CMO:0000046)
7	102588256	116249643	13661387	50000	0.0037	Bw17	body weight (CMO:0000012)
14	32593926	86191589	53597663	170000	0.0032	Pancm5	pancreas weight to body weight ratio (CMO:0000630)
14	41637569	80841518	39203949	120000	0.0031	Niddm28	blood glucose level area under curve (AUC) (CMO:0000350)
14	40315610	85315610	45000000	120000	0.0027	Bss81;Bss82;Bss83;Bss84	body length, nose to rump (CMO:0000079);tibia midshaft cross-sectional area (CMO:0001717);tibia midshaft endosteal cross-sectional area (CMO:0001716);tibia total energy absorbed before break (CMO:0001736)
7	103815550	126525386	22709836	50000	0.0022	Bmd79	total volumetric bone mineral density (CMO:0001728)
